# Supplementary material
Source: MDPI journal article supplement (https://www.mdpi.com/1424-8247/14/12/1247)

## Supplementary material

### **Hit Identification of a Novel Quinazoline Sulfonamide as a promising EphB3 inhibitor: Design, Virtual Combinatorial Library, Synthesis, Biological Evaluation, and Docking Simulation Studies**

#### Contents

1. Figure S1. The chemical structures of the generated virtual library
2. <sup>1</sup>HNMR and <sup>13</sup>CNMR data of compounds **3a–d** and **4a–f**
3. Representative HPLC purity data of the compounds **3a–d** and **4a–f**
4. Representative HRMS data of the compounds **3a–d** and **4a–f**

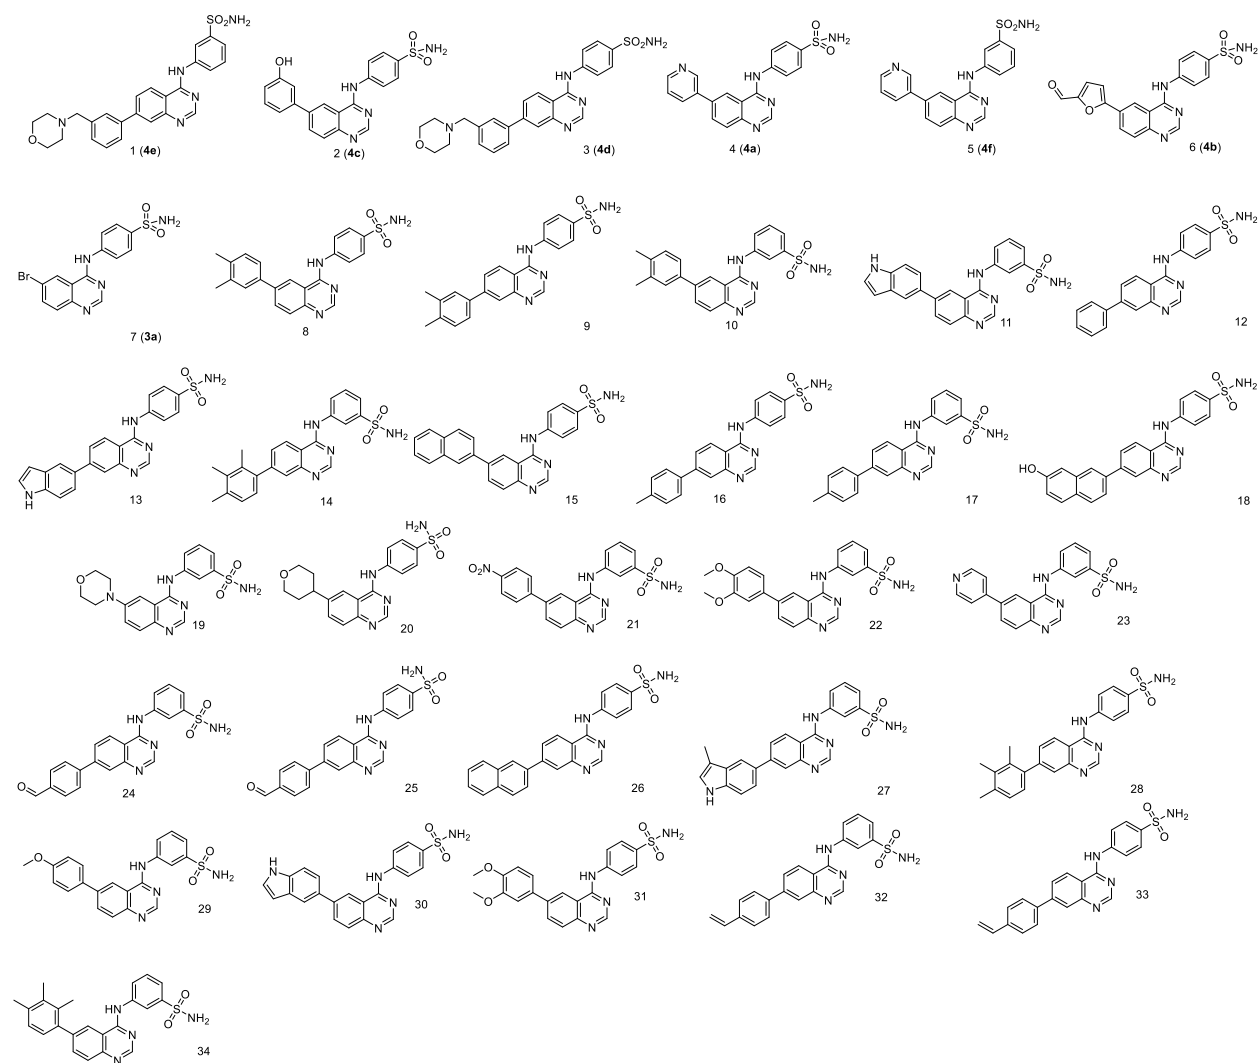

1. Figure S1. The chemical structures of the generated virtual library compounds

## 2. $^1\text{H}$ NMR and $^{13}\text{C}$ NMR data of compounds 3a–d and 4a–f

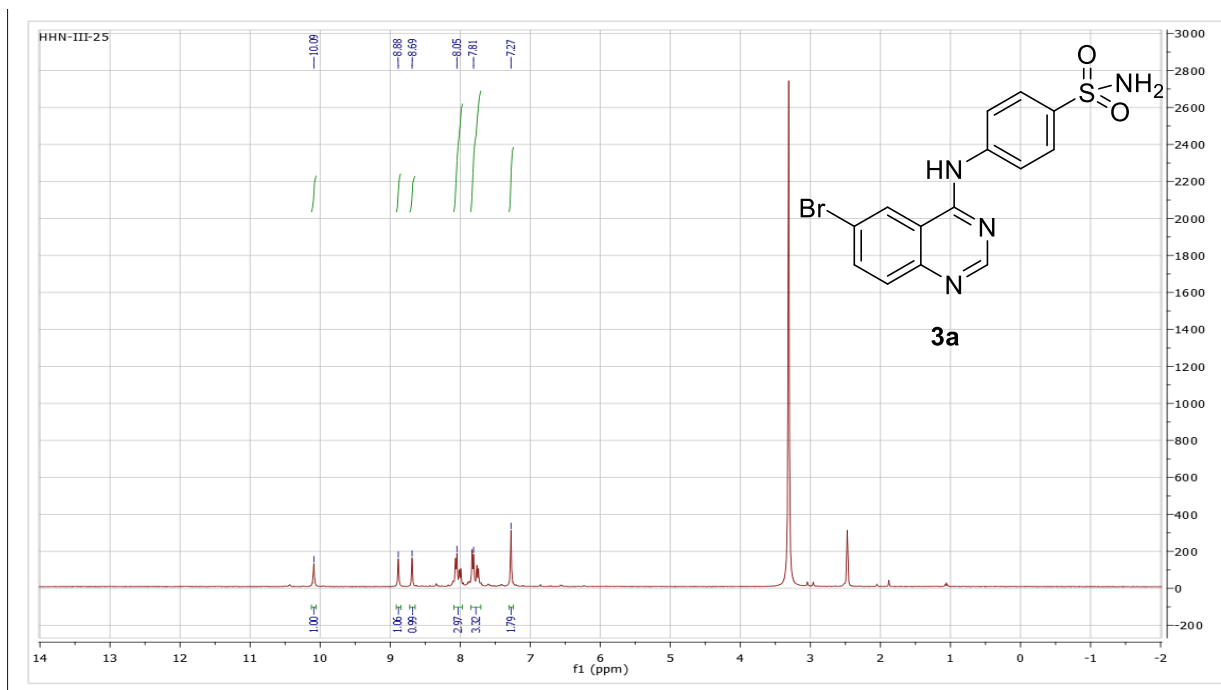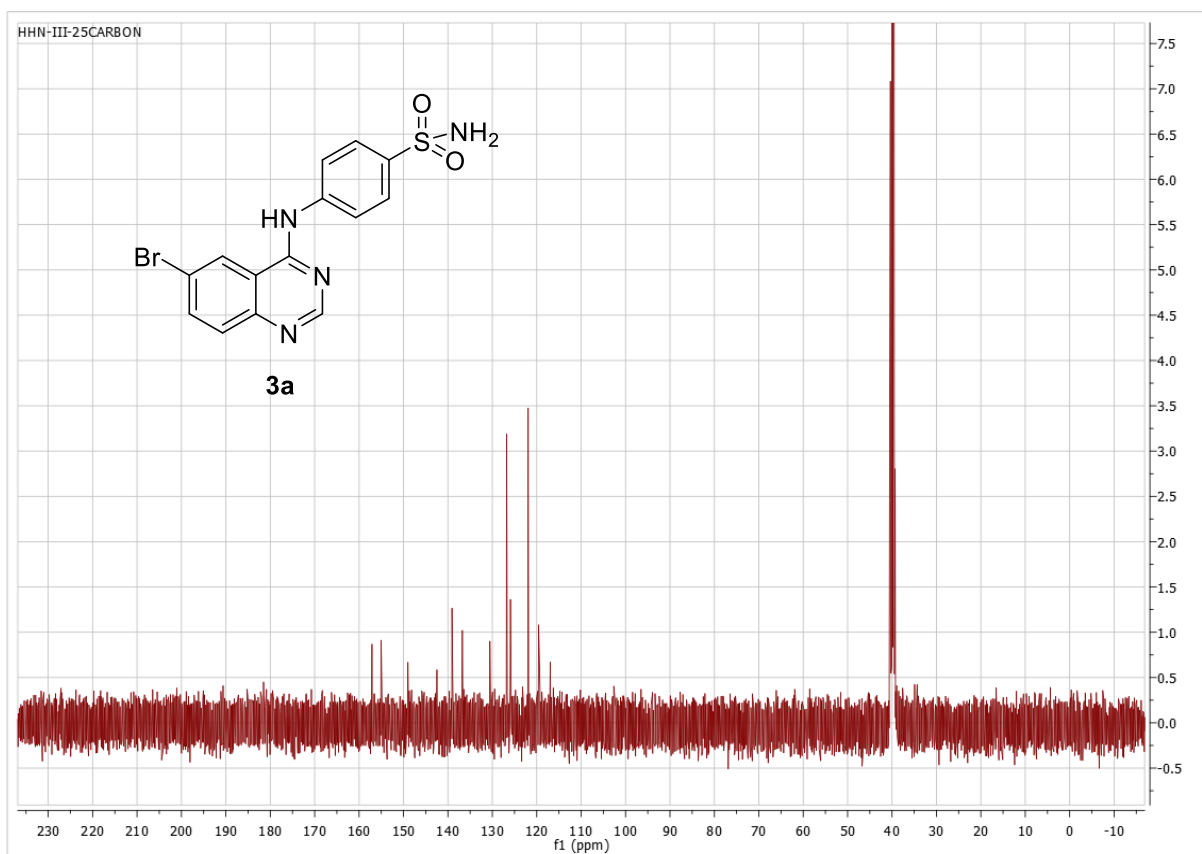

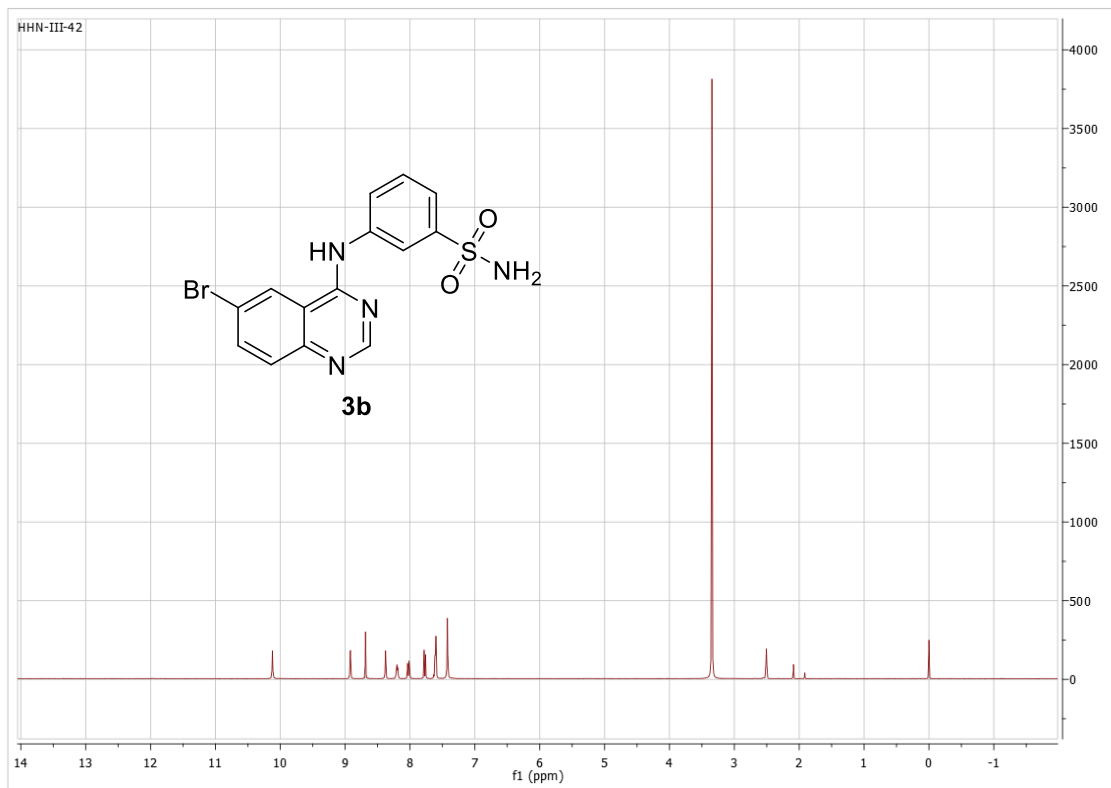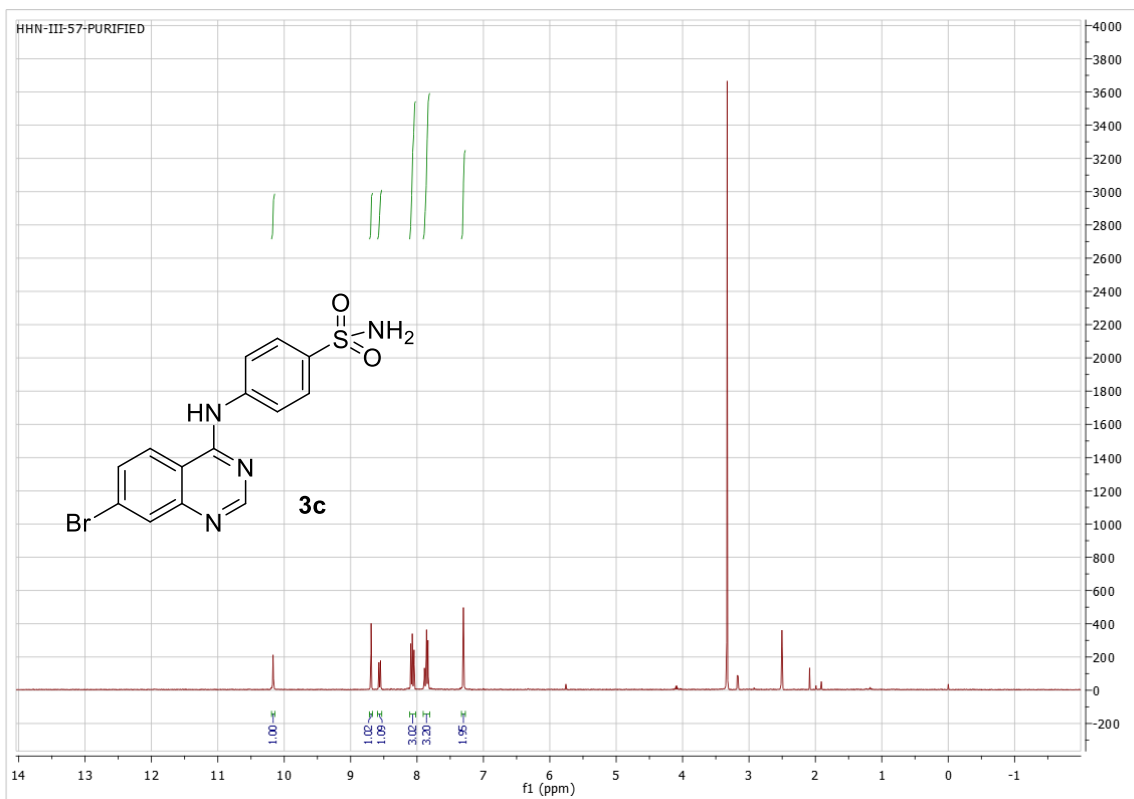

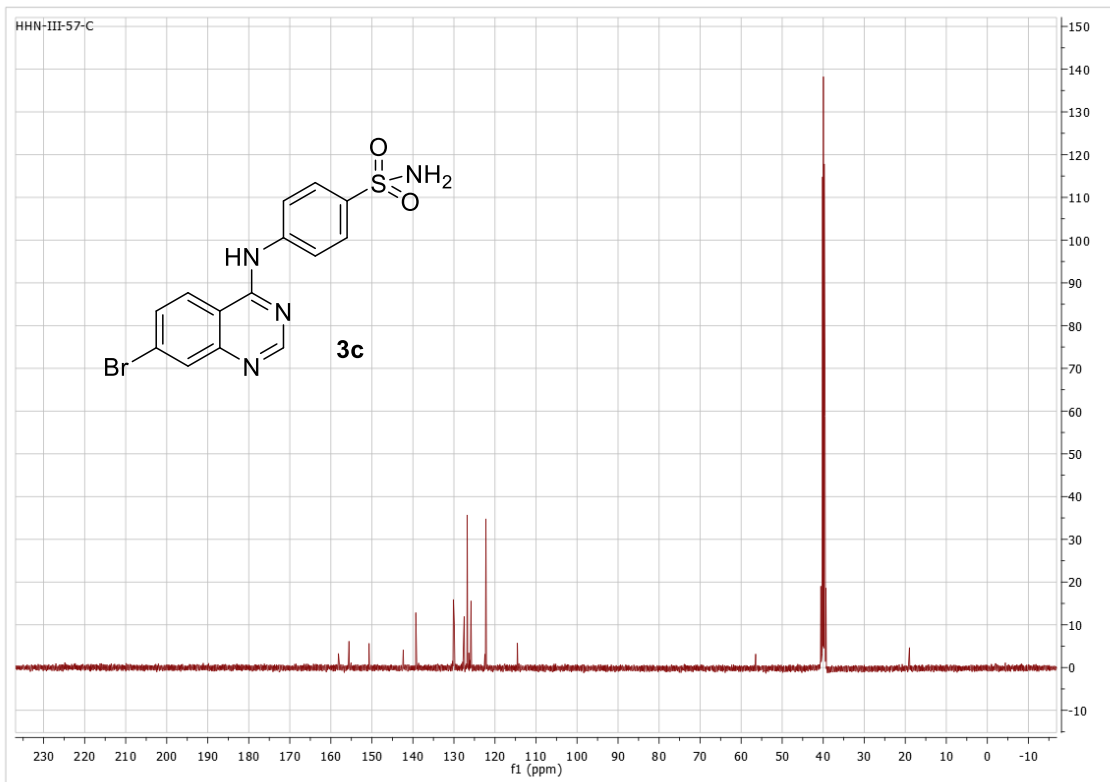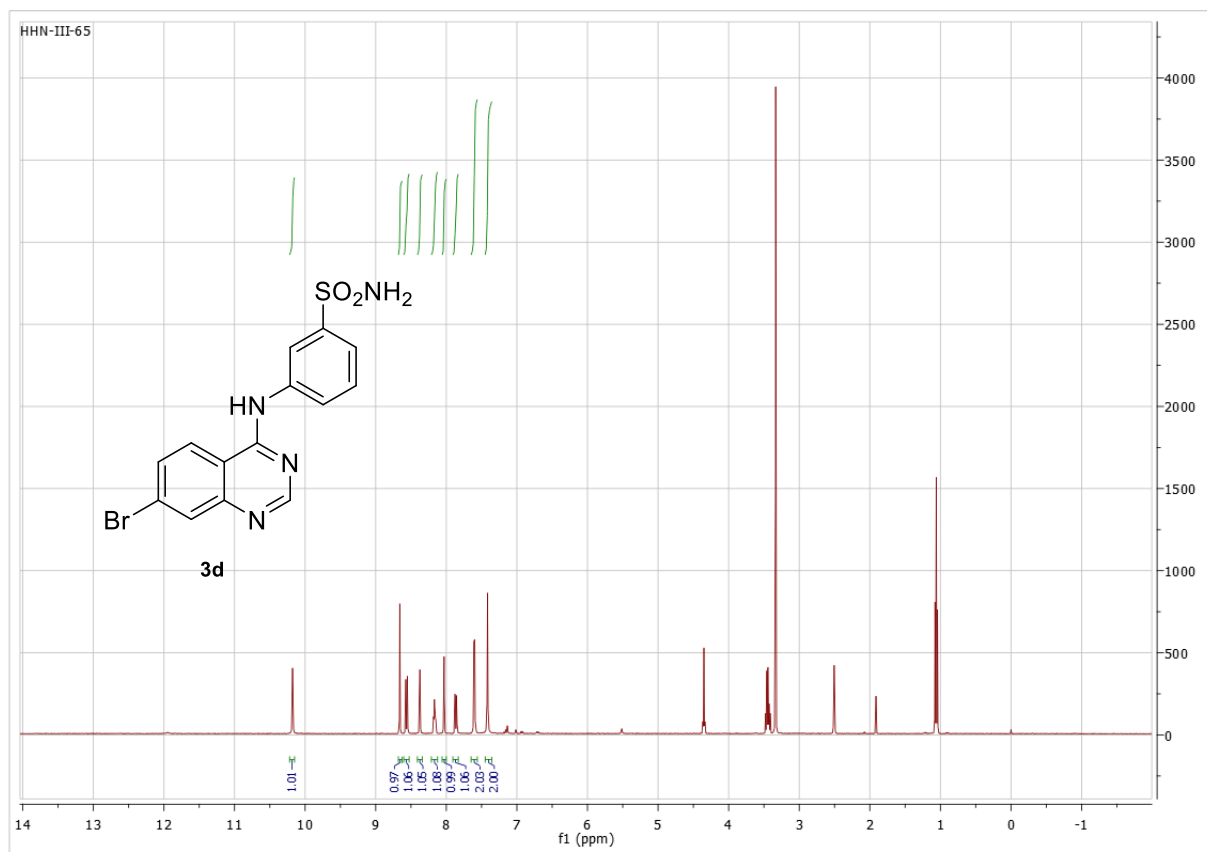



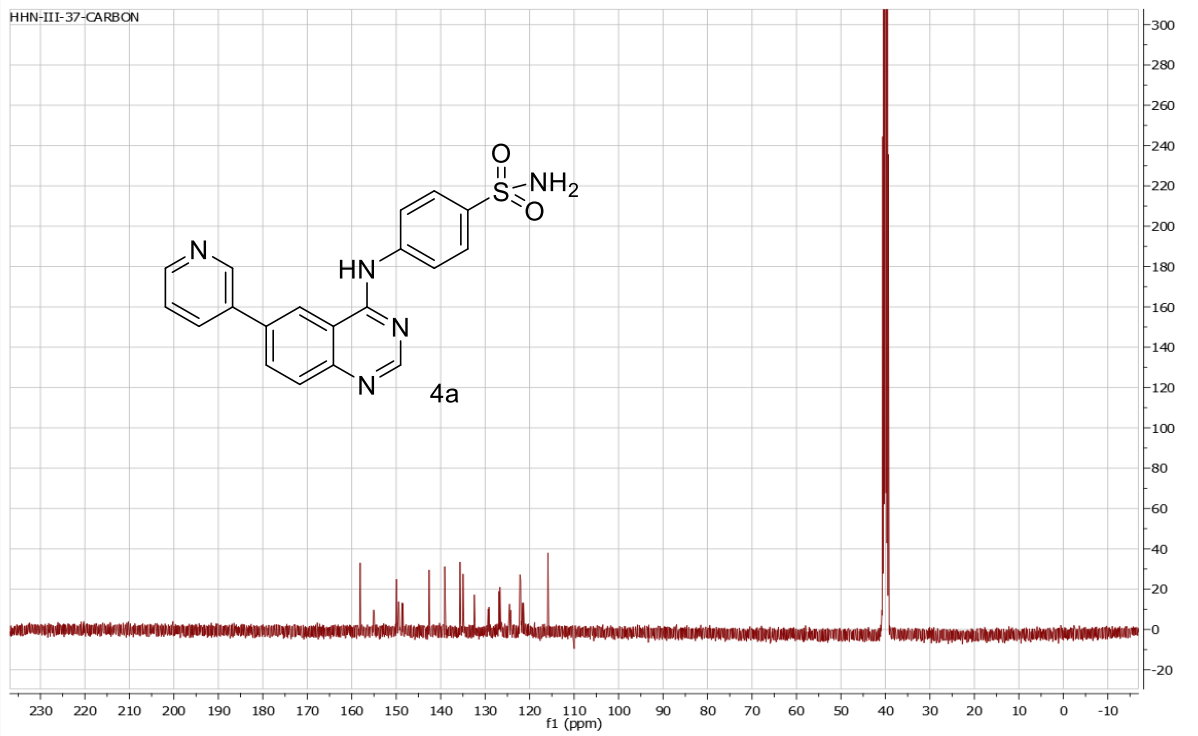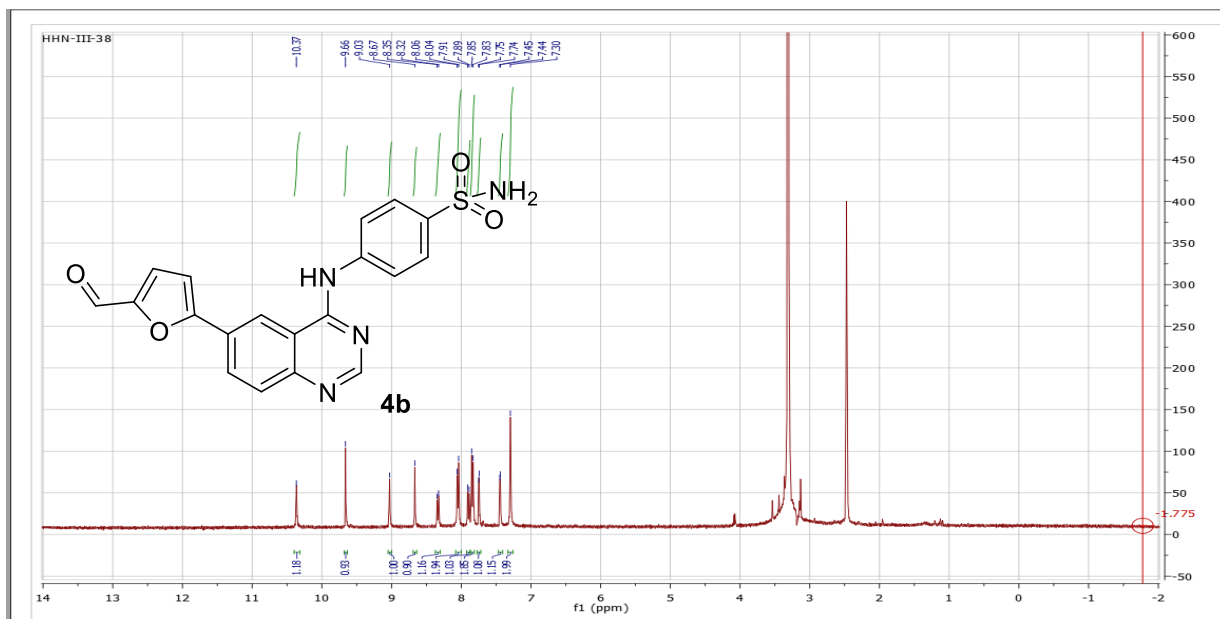

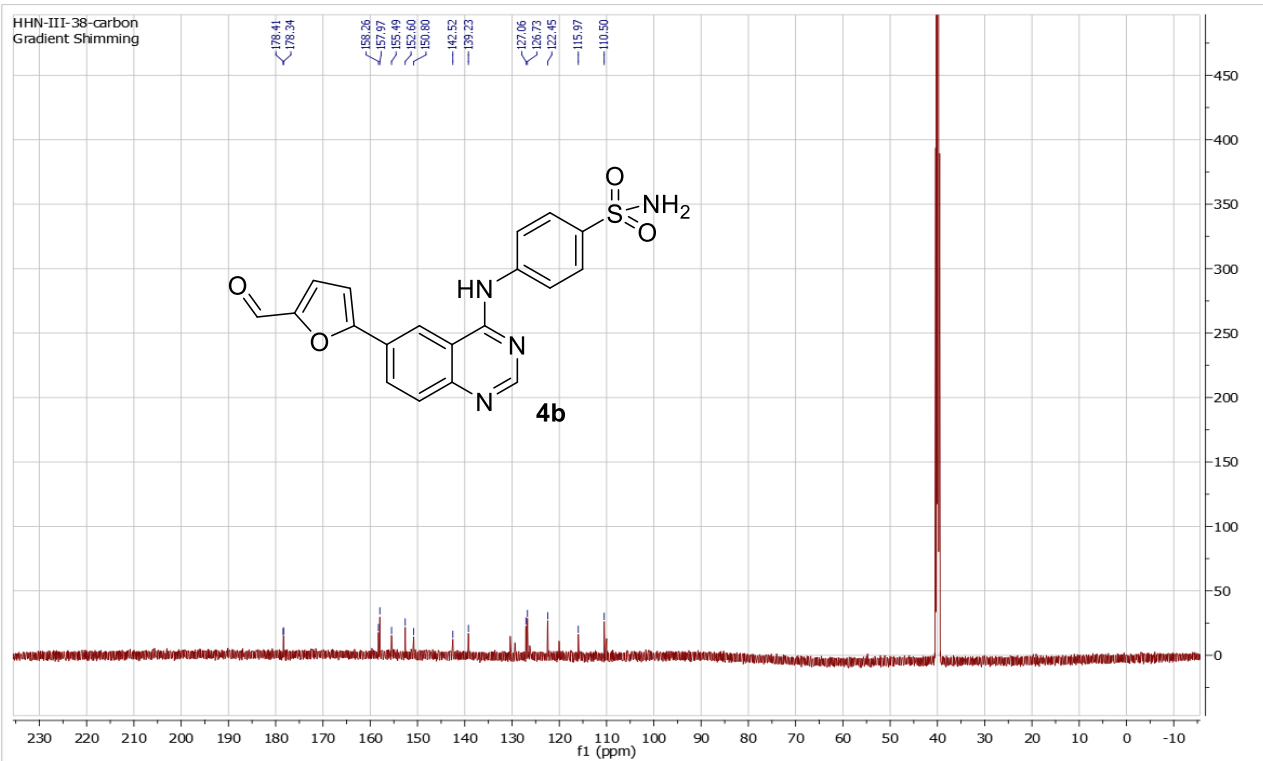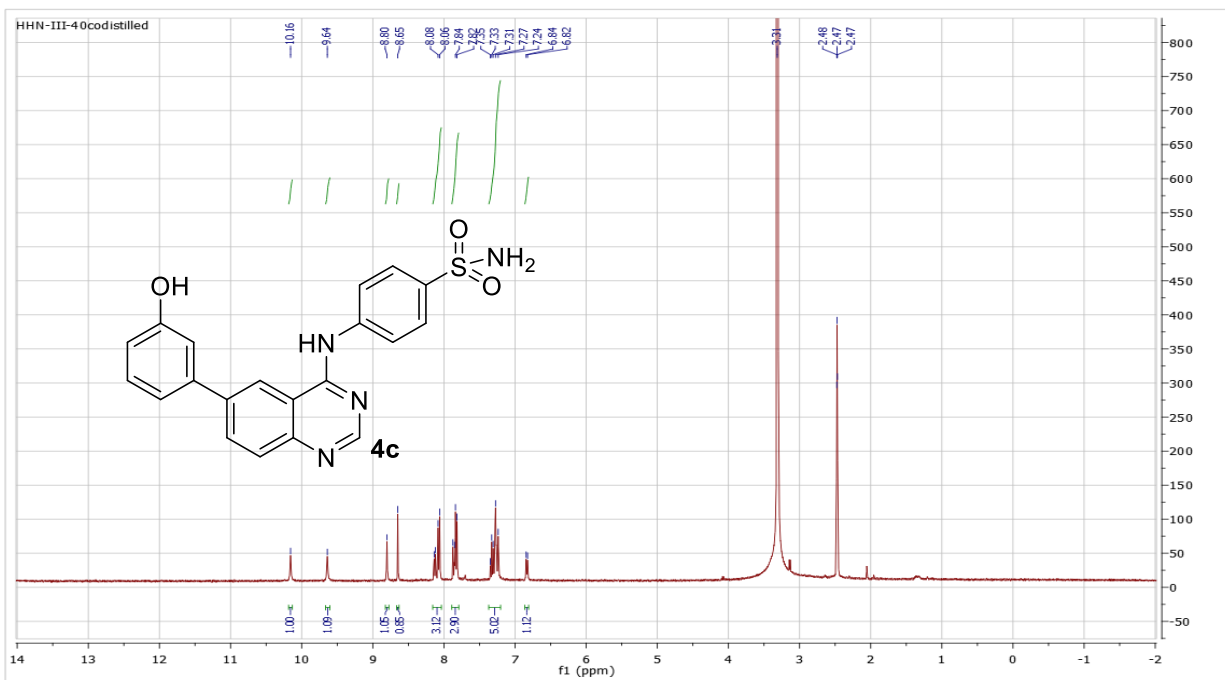



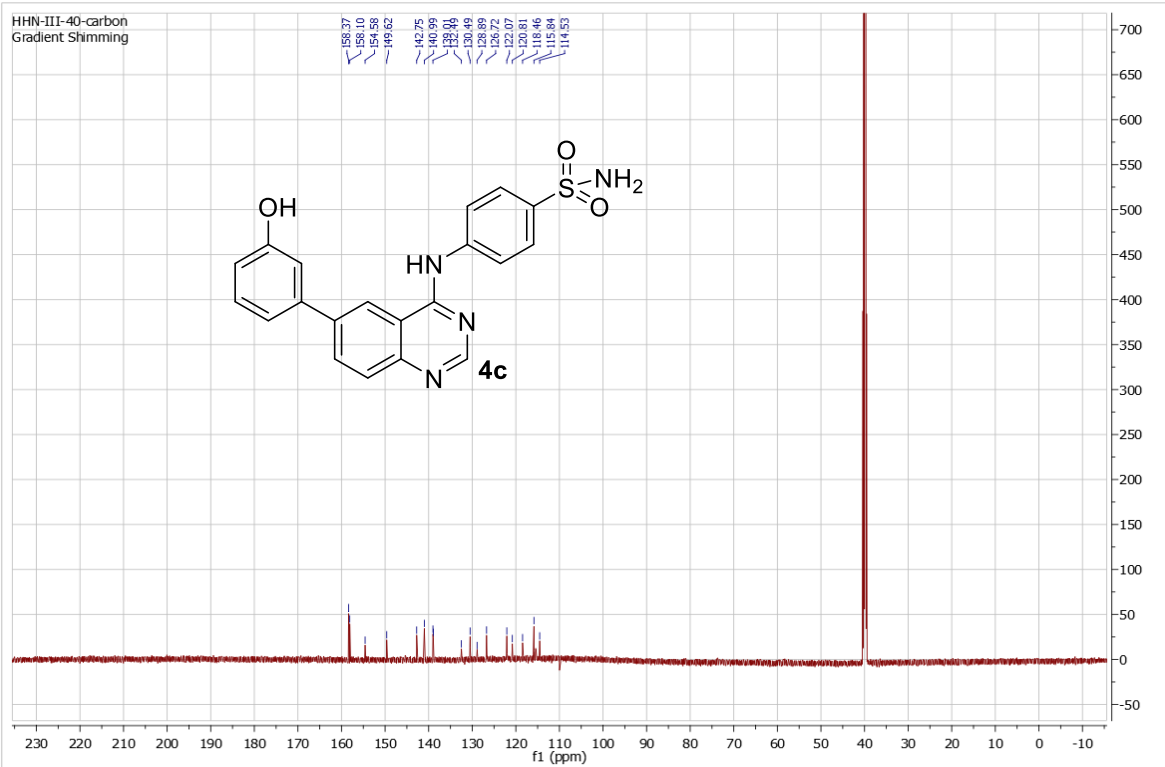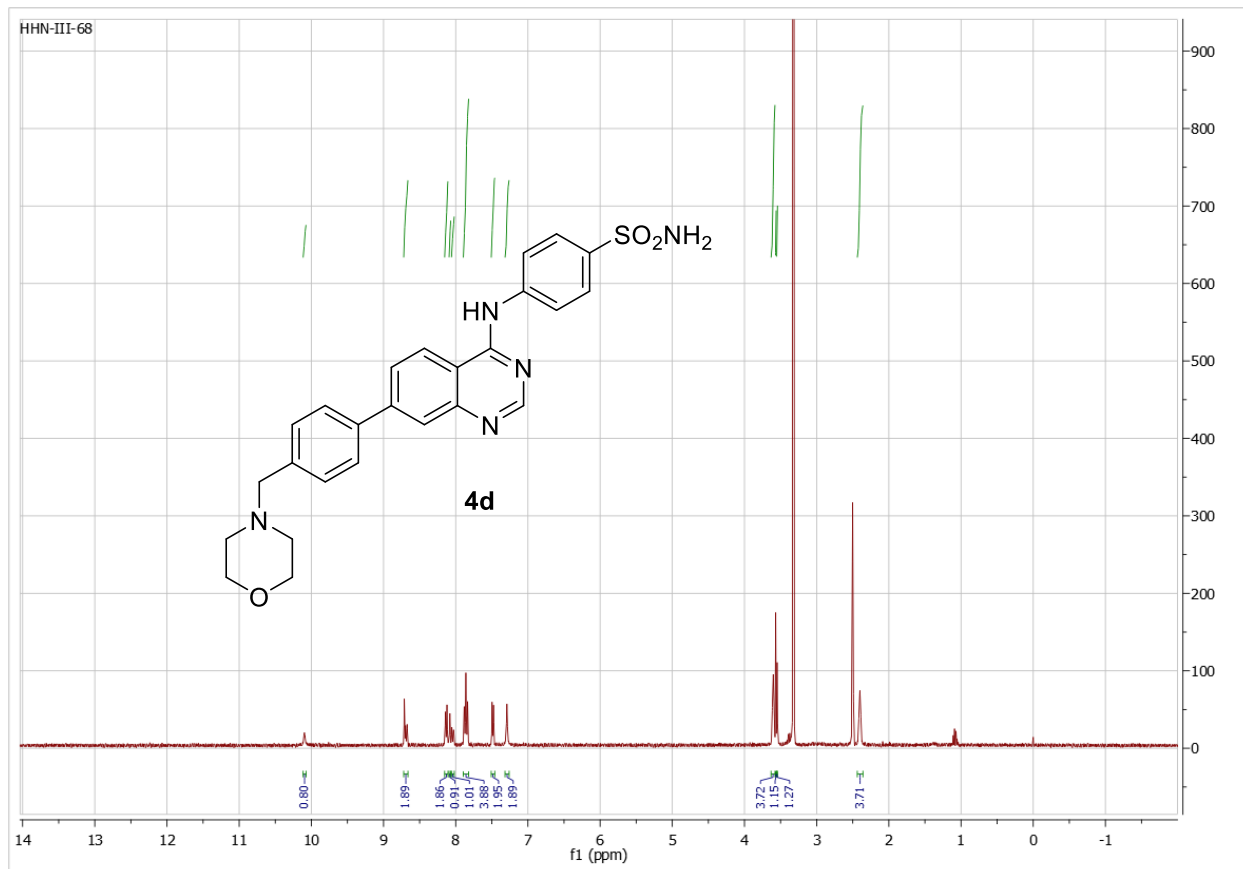

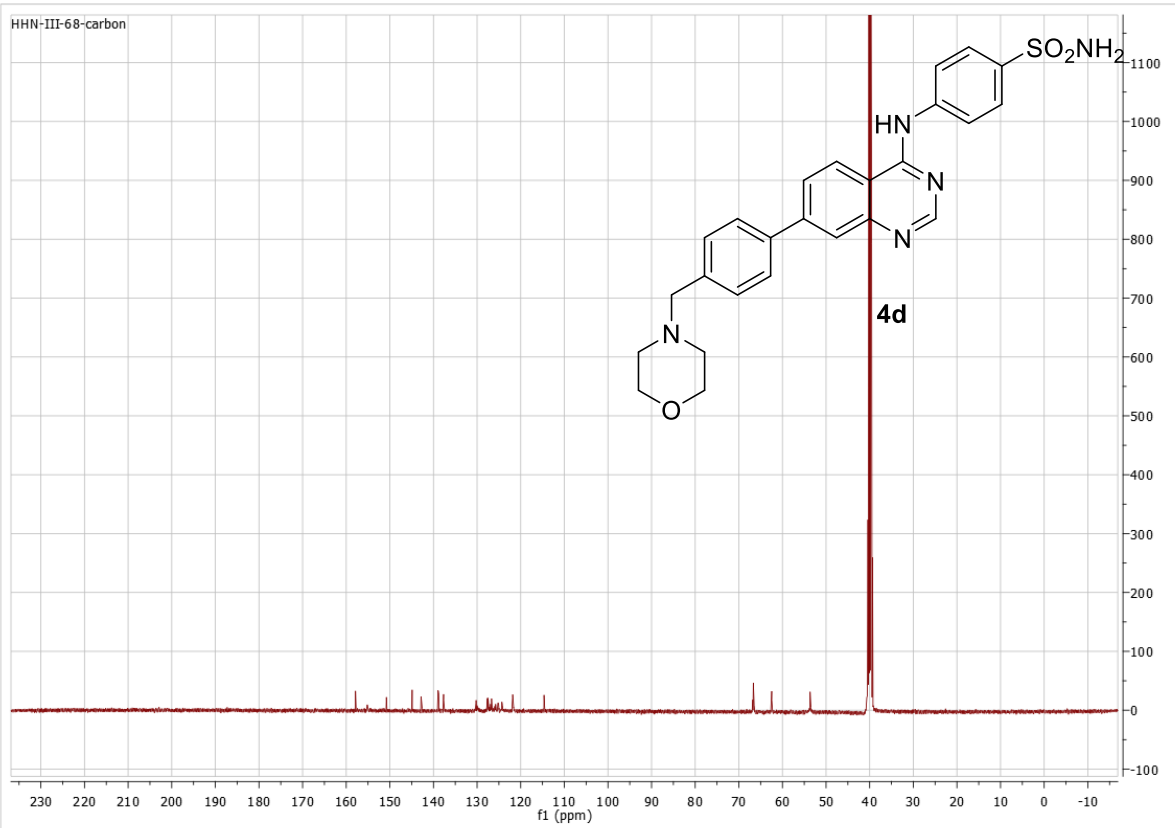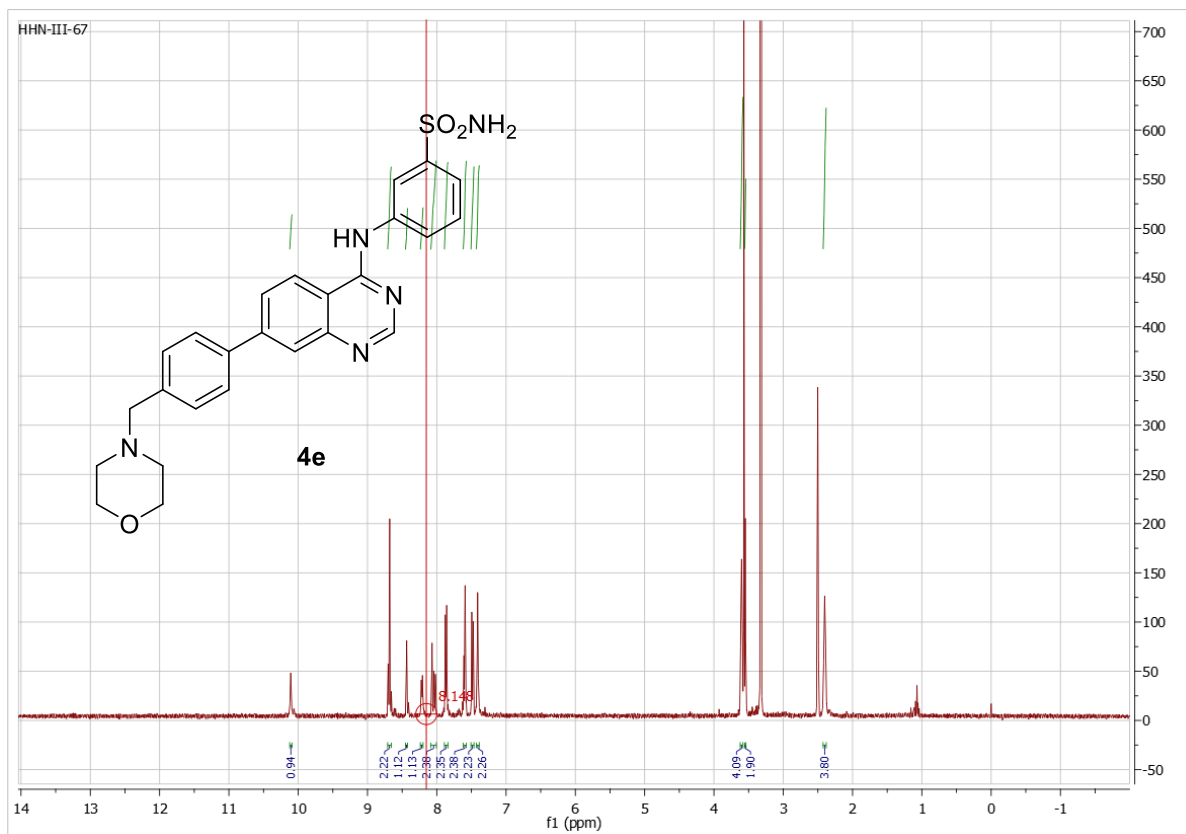

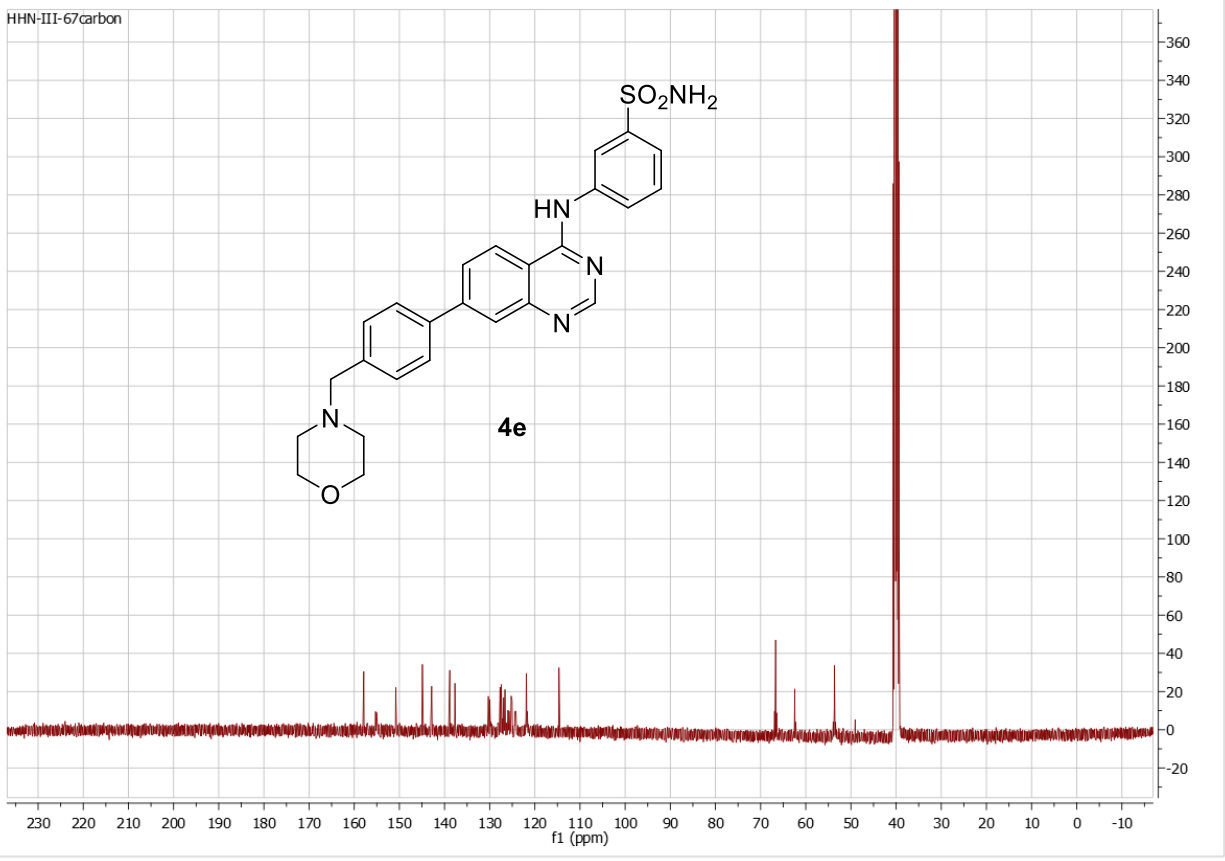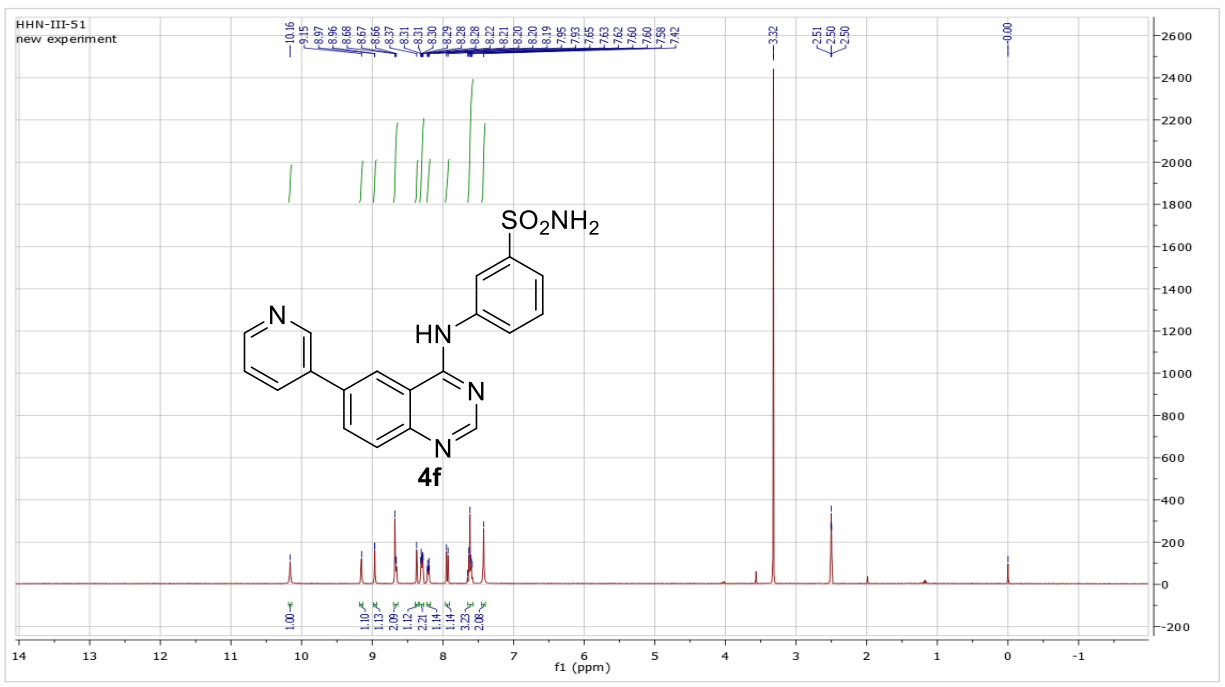

HHN-III-51-c13  
new experiment

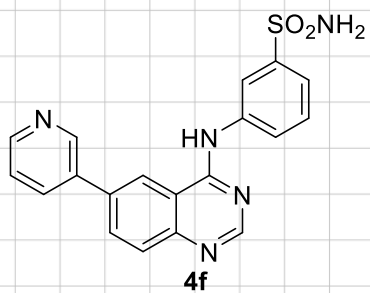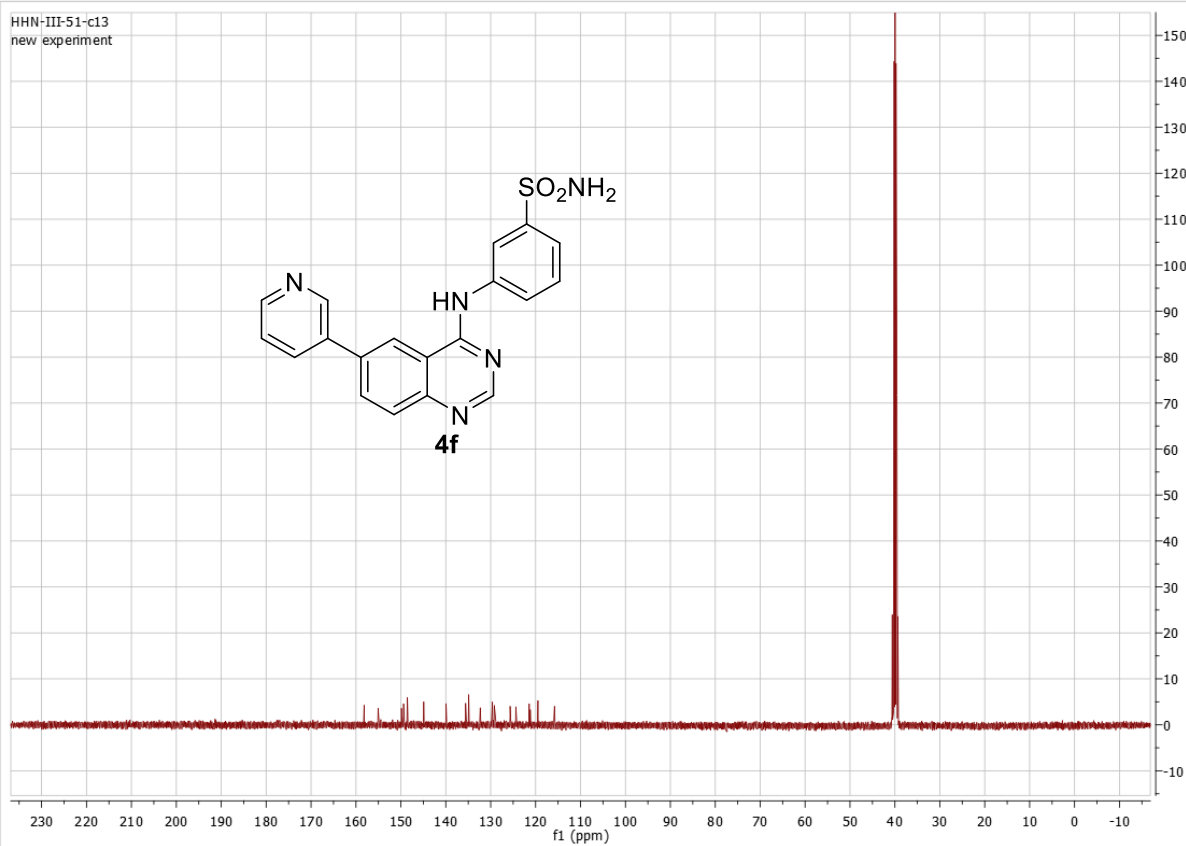

### 3. Representative HPLC purity data of the compounds 3a–d and 4a–f

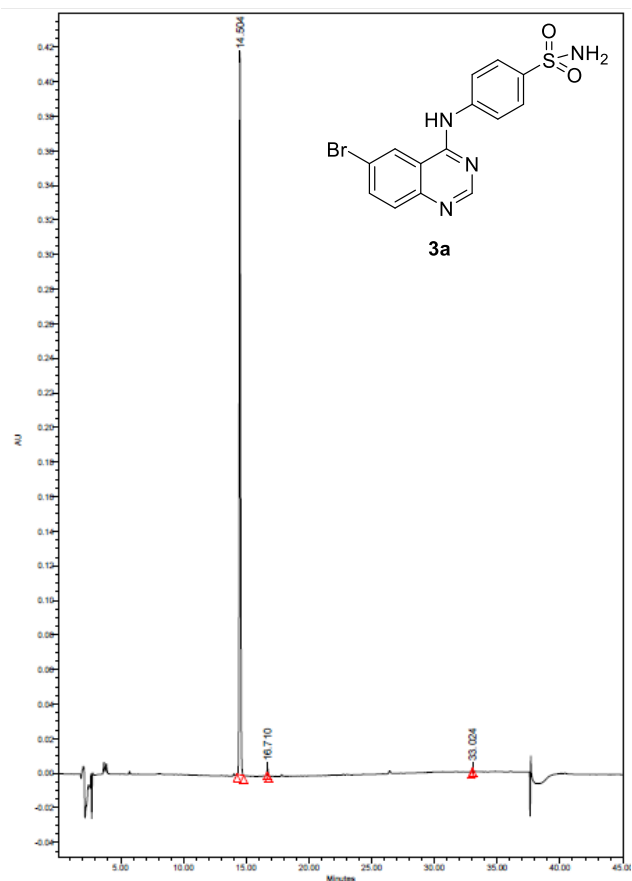

|   | Name | Retention Time (min) | Purity1 Angle | Purity1 Threshold | PDA Match1 Spect. Name | PDA Match1 Angle | PDA Match1 Threshold | PDA Match1 Lib. Name | Area (μV*sec) | % Area | Height (μV) | Int Type | Amount | Units |
|---|------|----------------------|---------------|-------------------|------------------------|------------------|----------------------|----------------------|---------------|--------|-------------|----------|--------|-------|
| 1 |      | 14.504               |               |                   |                        |                  |                      |                      | 2814904       | 99.46  | 418996      | bb       |        |       |
| 2 |      | 16.710               |               |                   |                        |                  |                      |                      | 11749         | 0.42   | 2587        | bb       |        |       |
| 3 |      | 33.024               |               |                   |                        |                  |                      |                      | 3664          | 0.13   | 851         | bb       |        |       |

|   | Peak Type | Peak Codes |
|---|-----------|------------|
| 1 | Unknown   |            |
| 2 | Unknown   |            |
| 3 | Unknown   |            |

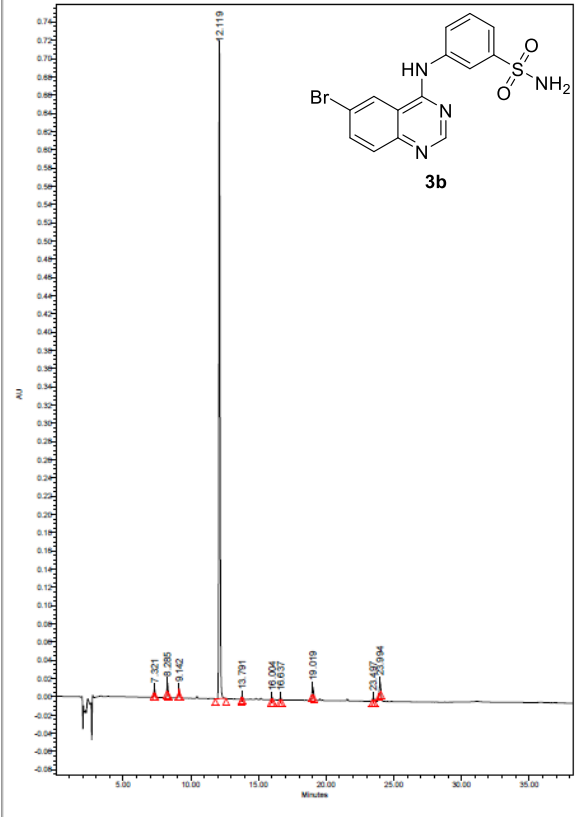

|    | Name | Retention Time (min) | Purity1 Angle | Purity1 Threshold | PDA Match1 Spect. Name | PDA Match1 Angle | PDA Match1 Threshold | PDA Match1 Lib. Name | Area (μV*sec) | % Area | Height (μV) | Int Type | Amount | Units |
|----|------|----------------------|---------------|-------------------|------------------------|------------------|----------------------|----------------------|---------------|--------|-------------|----------|--------|-------|
| 1  |      | 7.321                |               |                   |                        |                  |                      |                      | 19355         | 0.44   | 4478        | bb       |        |       |
| 2  |      | 8.285                |               |                   |                        |                  |                      |                      | 40947         | 0.93   | 9778        | bb       |        |       |
| 3  |      | 9.142                |               |                   |                        |                  |                      |                      | 12329         | 0.28   | 3927        | bb       |        |       |
| 4  |      | 12.119               |               |                   |                        |                  |                      |                      | 4200300       | 95.11  | 719106      | bb       |        |       |
| 5  |      | 13.791               |               |                   |                        |                  |                      |                      | 4753          | 0.11   | 1532        | bb       |        |       |
| 6  |      | 16.004               |               |                   |                        |                  |                      |                      | 7963          | 0.18   | 1941        | bb       |        |       |
| 7  |      | 16.637               |               |                   |                        |                  |                      |                      | 9446          | 0.21   | 1950        | bb       |        |       |
| 8  |      | 19.019               |               |                   |                        |                  |                      |                      | 46554         | 1.05   | 8646        | bb       |        |       |
| 9  |      | 23.497               |               |                   |                        |                  |                      |                      | 13240         | 0.30   | 2192        | bb       |        |       |
| 10 |      | 23.994               |               |                   |                        |                  |                      |                      | 61570         | 1.39   | 11239       | bb       |        |       |

|   | Peak Type | Peak Codes |
|---|-----------|------------|
| 1 | Unknown   |            |
| 2 | Unknown   |            |
| 3 | Unknown   |            |
| 4 | Unknown   |            |
| 5 | Unknown   |            |
| 6 | Unknown   |            |
| 7 | Unknown   |            |

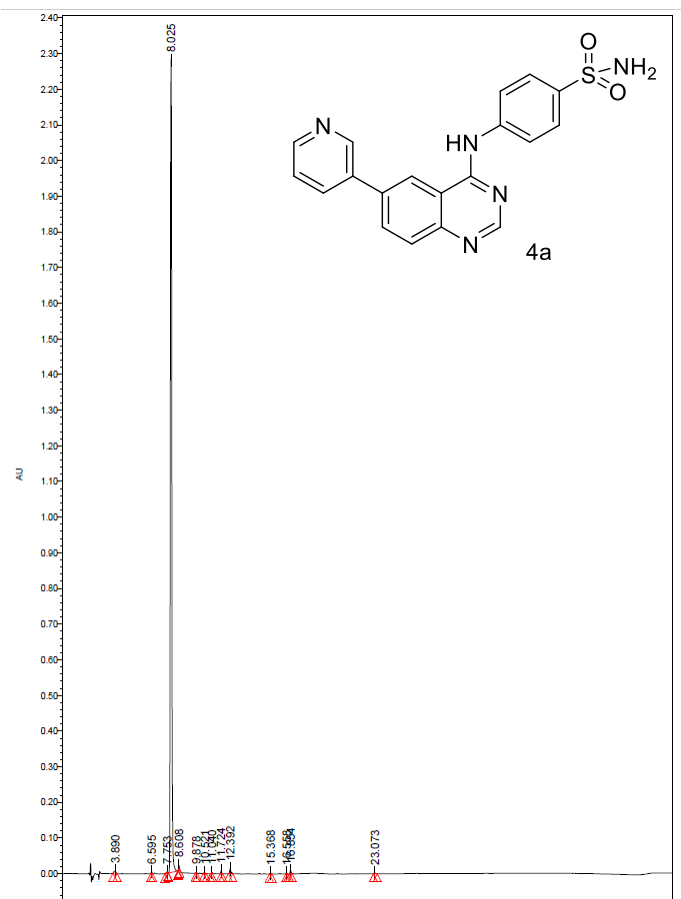

|    | Name | Retention Time (min) | Purity1 Angle | Purity1 Threshold | PDA Match1 Spect. Name | PDA Match1 Angle | PDA Match1 Threshold | PDA Match1 Lib. Name | Area (μV*sec) | % Area | Height (μV) | Int Type | Amount | Units |
|----|------|----------------------|---------------|-------------------|------------------------|------------------|----------------------|----------------------|---------------|--------|-------------|----------|--------|-------|
| 1  |      | 3.890                |               |                   |                        |                  |                      |                      | 63553         | 0.37   | 6105        | bb       |        |       |
| 2  |      | 6.595                |               |                   |                        |                  |                      |                      | 22251         | 0.13   | 4998        | bb       |        |       |
| 3  |      | 7.753                |               |                   |                        |                  |                      |                      | 21317         | 0.12   | 2894        | bb       |        |       |
| 4  |      | 8.025                |               |                   |                        |                  |                      |                      | 16982488      | 97.84  | 2329599     | bb       |        |       |
| 5  |      | 8.608                |               |                   |                        |                  |                      |                      | 40468         | 0.23   | 11424       | bb       |        |       |
| 6  |      | 9.878                |               |                   |                        |                  |                      |                      | 4961          | 0.03   | 1133        | bb       |        |       |
| 7  |      | 10.521               |               |                   |                        |                  |                      |                      | 8423          | 0.05   | 1935        | bb       |        |       |
| 8  |      | 11.040               |               |                   |                        |                  |                      |                      | 4678          | 0.03   | 1354        | bb       |        |       |
| 9  |      | 11.724               |               |                   |                        |                  |                      |                      | 34580         | 0.20   | 7203        | bb       |        |       |
| 10 |      | 12.392               |               |                   |                        |                  |                      |                      | 91000         | 0.52   | 13377       | bb       |        |       |
| 11 |      | 15.368               |               |                   |                        |                  |                      |                      | 12031         | 0.07   | 2334        | bb       |        |       |
| 12 |      | 16.558               |               |                   |                        |                  |                      |                      | 8614          | 0.05   | 2011        | bb       |        |       |
| 13 |      | 16.854               |               |                   |                        |                  |                      |                      | 47861         | 0.28   | 9054        | bb       |        |       |
| 14 |      | 23.073               |               |                   |                        |                  |                      |                      | 14914         | 0.09   | 2018        | bb       |        |       |

|   | Peak Type | Peak Codes |
|---|-----------|------------|
| 1 | Unknown   |            |
| 2 | Unknown   |            |
| 3 | Unknown   |            |

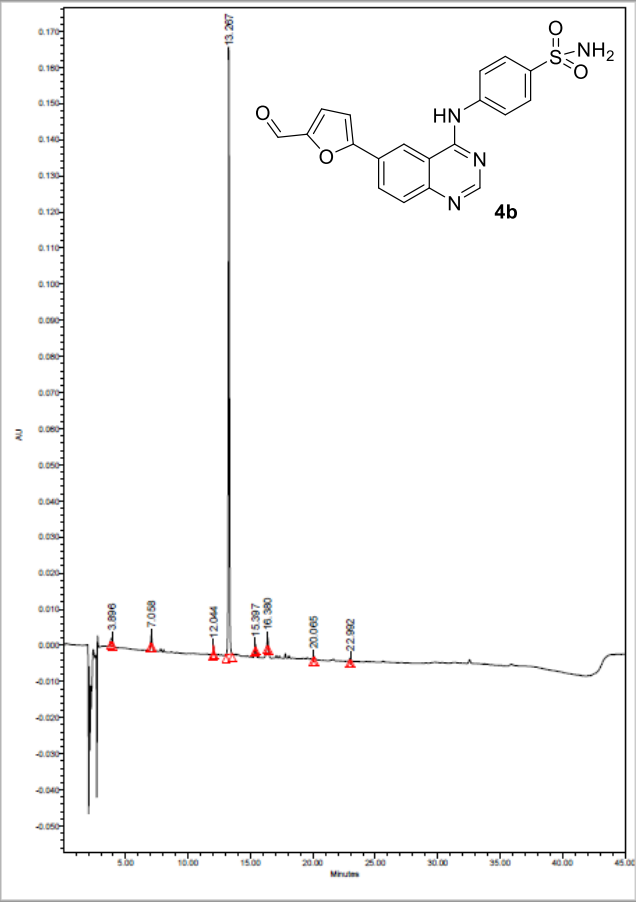

|   | Name | Retention Time (min) | Purity1 Angle | Purity1 Threshold | PDA Match1 Spect. Name | PDA Match1 Angle | PDA Match1 Threshold | PDA Match1 Lib. Name | Area (μV*sec) | % Area | Height (μV) | Int Type | Amount | Units |
|---|------|----------------------|---------------|-------------------|------------------------|------------------|----------------------|----------------------|---------------|--------|-------------|----------|--------|-------|
| 1 |      | 3.896                |               |                   |                        |                  |                      |                      | 9414          | 0.92   | 1205        | bb       |        |       |
| 2 |      | 7.058                |               |                   |                        |                  |                      |                      | 11571         | 1.13   | 2388        | bb       |        |       |
| 3 |      | 12.044               |               |                   |                        |                  |                      |                      | 5960          | 0.58   | 1692        | bb       |        |       |
| 4 |      | 13.267               |               |                   |                        |                  |                      |                      | 977556        | 95.54  | 167740      | bb       |        |       |
| 5 |      | 15.397               |               |                   |                        |                  |                      |                      | 2373          | 0.23   | 950         | bb       |        |       |
| 6 |      | 16.380               |               |                   |                        |                  |                      |                      | 11354         | 1.11   | 2287        | bb       |        |       |
| 7 |      | 20.065               |               |                   |                        |                  |                      |                      | 2506          | 0.24   | 490         | bb       |        |       |
| 8 |      | 22.992               |               |                   |                        |                  |                      |                      | 2450          | 0.24   | 495         | bb       |        |       |

|   | Peak Type | Peak Codes |
|---|-----------|------------|
| 1 | Unknown   |            |
| 2 | Unknown   |            |
| 3 | Unknown   |            |
| 4 | Unknown   |            |
| 5 | Unknown   |            |
| 6 | Unknown   |            |
| 7 | Unknown   |            |
| 8 | Unknown   |            |



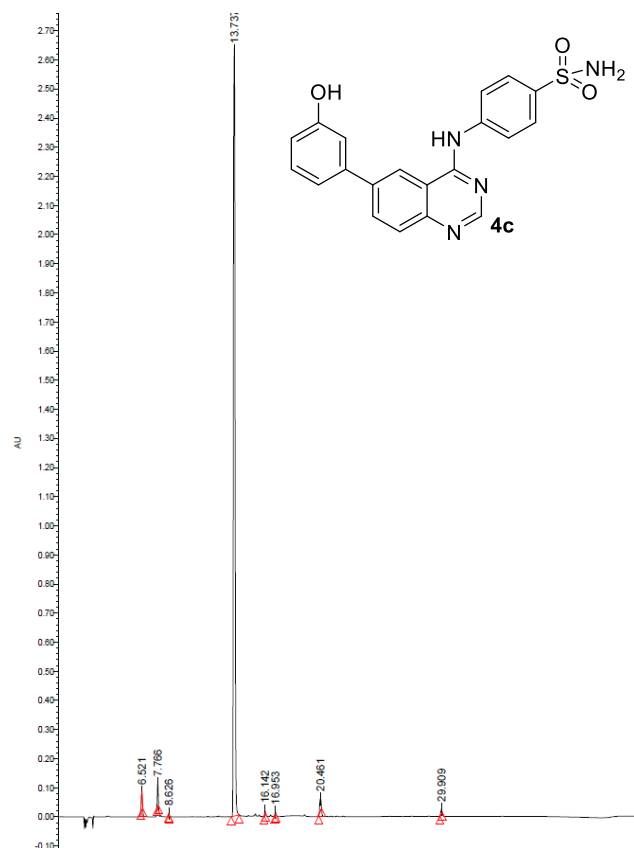

|   | Name | Retention Time (min) | Purity1 Angle | Purity1 Threshold | PDA Match1 Spect. Name | PDA Match1 Angle | PDA Match1 Threshold | PDA Match1 Lib. Name | Area (μV*sec) | % Area | Height (μV) | Int Type | Amount | Units |
|---|------|----------------------|---------------|-------------------|------------------------|------------------|----------------------|----------------------|---------------|--------|-------------|----------|--------|-------|
| 1 |      | 6.521                |               |                   |                        |                  |                      |                      | 356940        | 1.44   | 61650       | bb       |        |       |
| 2 |      | 7.766                |               |                   |                        |                  |                      |                      | 366231        | 1.47   | 78682       | bb       |        |       |
| 3 |      | 8.626                |               |                   |                        |                  |                      |                      | 9721          | 0.04   | 3802        | bb       |        |       |
| 4 |      | 13.737               |               |                   |                        |                  |                      |                      | 23613610      | 95.10  | 2674274     | bb       |        |       |
| 5 |      | 16.142               |               |                   |                        |                  |                      |                      | 42853         | 0.17   | 11096       | bb       |        |       |
| 6 |      | 16.953               |               |                   |                        |                  |                      |                      | 30956         | 0.12   | 8644        | bb       |        |       |
| 7 |      | 20.461               |               |                   |                        |                  |                      |                      | 333272        | 1.34   | 43255       | bb       |        |       |
| 8 |      | 29.909               |               |                   |                        |                  |                      |                      | 76127         | 0.31   | 13868       | bb       |        |       |

|   | Peak Type | Peak Codes |
|---|-----------|------------|
| 1 | Unknown   |            |
| 2 | Unknown   |            |
| 3 | Unknown   |            |
| 4 | Unknown   |            |
| 5 | Unknown   |            |
| 6 | Unknown   |            |
| 7 | Unknown   |            |
| 8 | Unknown   |            |

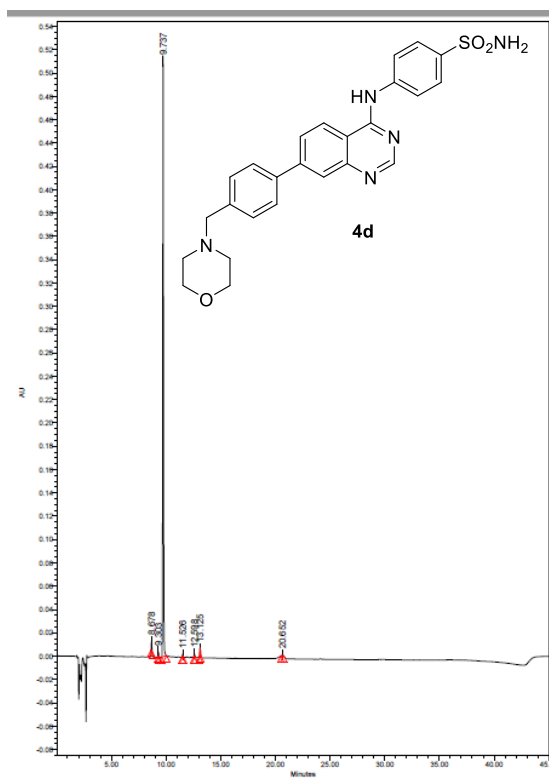

|   | Name | Retention Time (min) | Purity1 Angle | Purity1 Threshold | PDA Match1 Spect. Name | PDA Match1 Angle | PDA Match1 Threshold | PDA Match1 Lib. Name | Area (μV*sec) | % Area | Height (μV) | Int Type | Amount | Units |
|---|------|----------------------|---------------|-------------------|------------------------|------------------|----------------------|----------------------|---------------|--------|-------------|----------|--------|-------|
| 1 |      | 8.678                |               |                   |                        |                  |                      |                      | 28190         | 1.13   | 7920        | bb       |        |       |
| 2 |      | 9.303                |               |                   |                        |                  |                      |                      | 14303         | 0.57   | 3748        | bb       |        |       |
| 3 |      | 9.737                |               |                   |                        |                  |                      |                      | 2415863       | 96.63  | 506364      | bb       |        |       |
| 4 |      | 11.526               |               |                   |                        |                  |                      |                      | 4588          | 0.18   | 1490        | bb       |        |       |
| 5 |      | 12.598               |               |                   |                        |                  |                      |                      | 7205          | 0.29   | 2042        | bb       |        |       |
| 6 |      | 13.125               |               |                   |                        |                  |                      |                      | 25605         | 1.02   | 6520        | bb       |        |       |
| 7 |      | 20.652               |               |                   |                        |                  |                      |                      | 4487          | 0.18   | 505         | bb       |        |       |

|   | Peak Type | Peak Codes |
|---|-----------|------------|
| 1 | Unknown   |            |
| 2 | Unknown   |            |
| 3 | Unknown   |            |
| 4 | Unknown   |            |
| 5 | Unknown   |            |
| 6 | Unknown   |            |
| 7 | Unknown   |            |

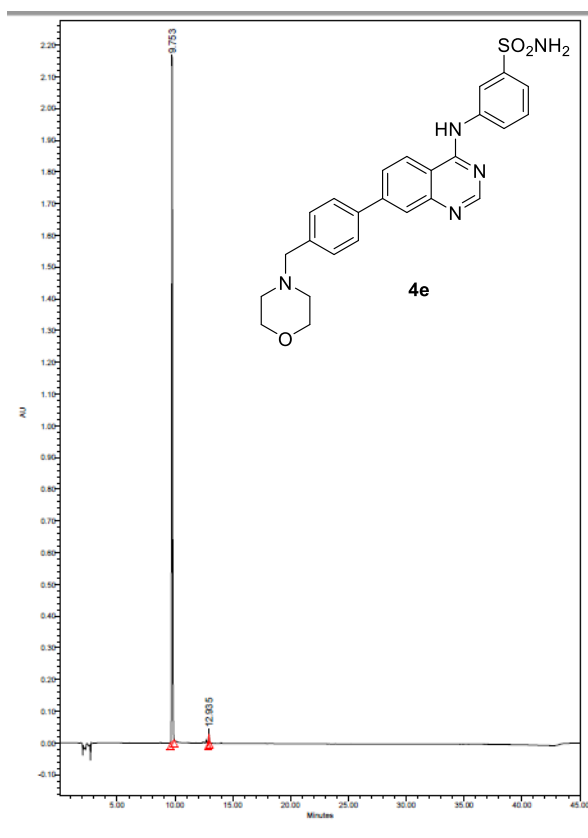

|   | Name | Retention Time (min) | Purity1 Angle | Purity1 Threshold | PDA Match1 Spect. Name | PDA Match1 Angle | PDA Match1 Threshold | PDA Match1 Lib. Name | Area (μV*sec) | % Area | Height (μV) | Int Type | Amount | Units |
|---|------|----------------------|---------------|-------------------|------------------------|------------------|----------------------|----------------------|---------------|--------|-------------|----------|--------|-------|
| 1 |      | 9.753                |               |                   |                        |                  |                      |                      | 11379618      | 99.15  | 2167466     | bb       |        |       |
| 2 |      | 12.935               |               |                   |                        |                  |                      |                      | 98094         | 0.85   | 23466       | bb       |        |       |

|   | Peak Type | Peak Codes |
|---|-----------|------------|
| 1 | Unknown   |            |
| 2 | Unknown   |            |

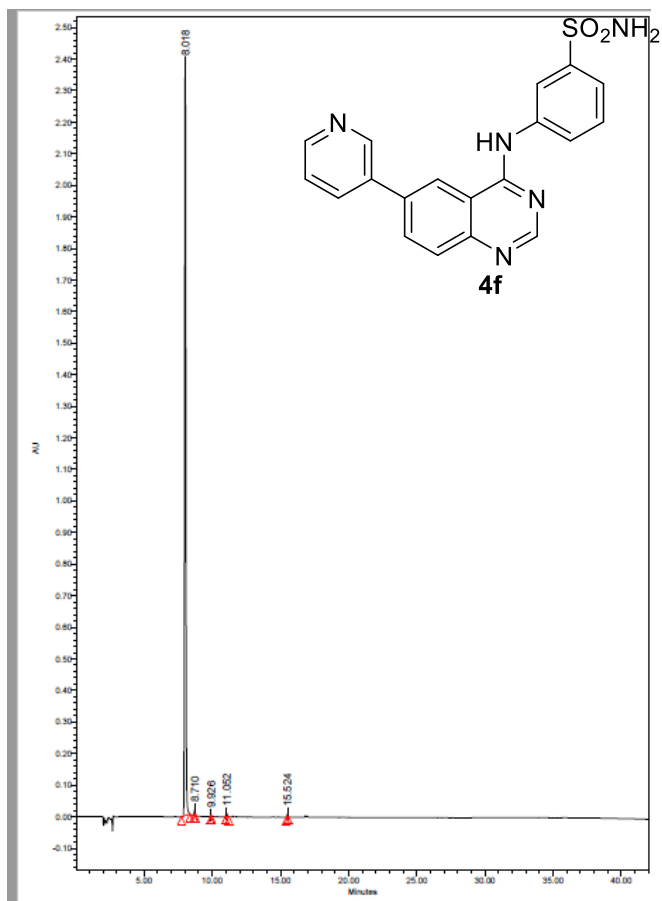

|   | Name | Retention Time (min) | Purity1 Angle | Purity1 Threshold | PDA Match1 Spect. Name | PDA Match1 Angle | PDA Match1 Threshold | PDA Match1 Lib. Name | Area (μV*sec) | % Area | Height (μV) | Int Type | Amount | Units |
|---|------|----------------------|---------------|-------------------|------------------------|------------------|----------------------|----------------------|---------------|--------|-------------|----------|--------|-------|
| 1 |      | 8.018                |               |                   |                        |                  |                      |                      | 14986262      | 98.93  | 2414157     | bb       |        |       |
| 2 |      | 8.710                |               |                   |                        |                  |                      |                      | 54838         | 0.36   | 13790       | bb       |        |       |
| 3 |      | 9.926                |               |                   |                        |                  |                      |                      | 6003          | 0.04   | 2000        | bb       |        |       |
| 4 |      | 11.052               |               |                   |                        |                  |                      |                      | 63323         | 0.42   | 9654        | bb       |        |       |
| 5 |      | 15.524               |               |                   |                        |                  |                      |                      | 38428         | 0.25   | 8270        | bb       |        |       |

|   | Peak Type | Peak Codes |
|---|-----------|------------|
| 1 | Unknown   |            |
| 2 | Unknown   |            |
| 3 | Unknown   |            |
| 4 | Unknown   |            |
| 5 | Unknown   |            |

#### 4. Representative HRMS data of the compounds 3a–d and 4a–f

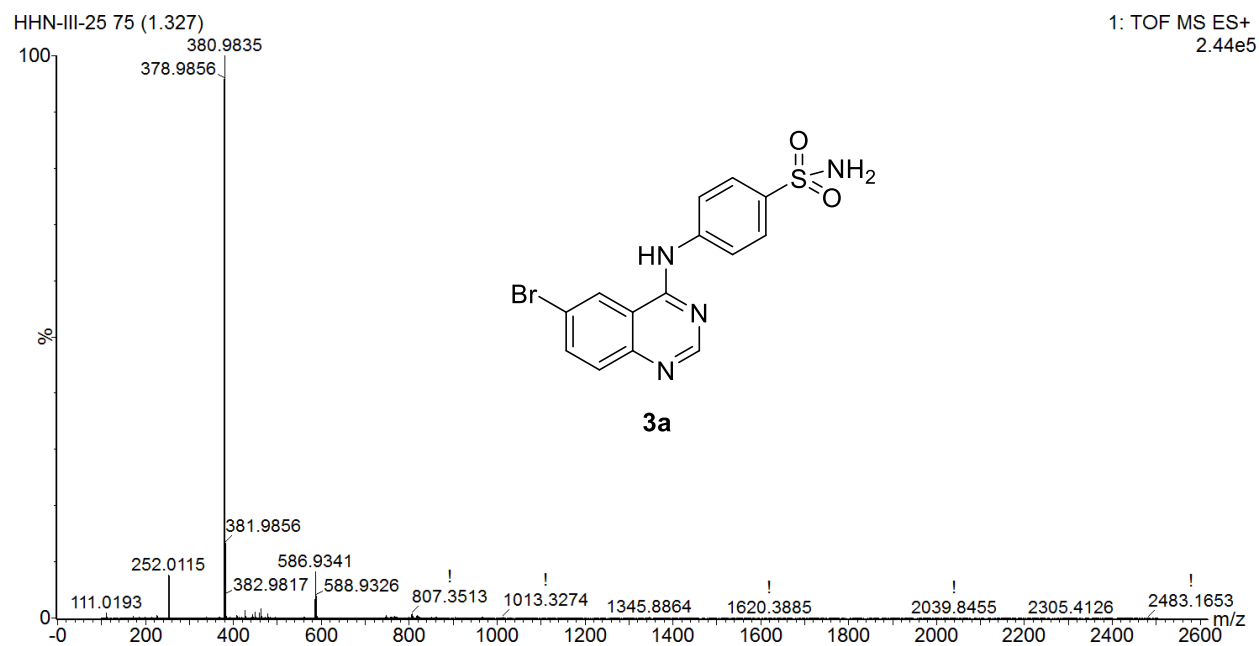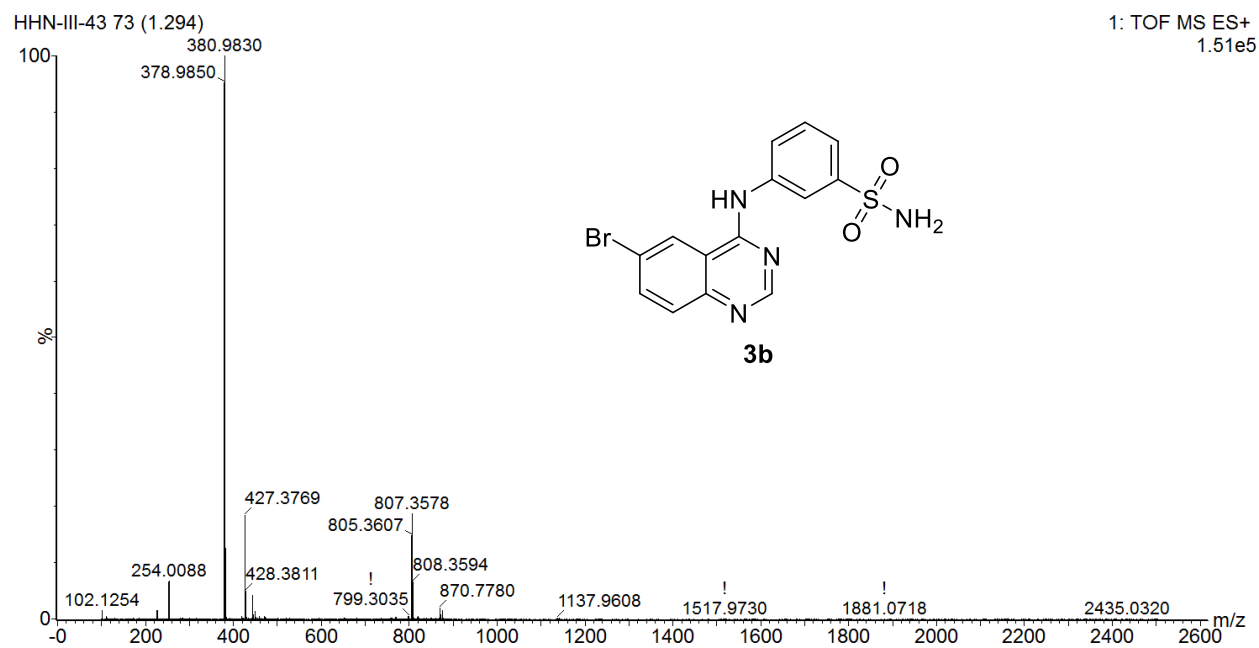

HHN-III-37 66 (1.173)

1: TOF MS ES+  
7.78e5

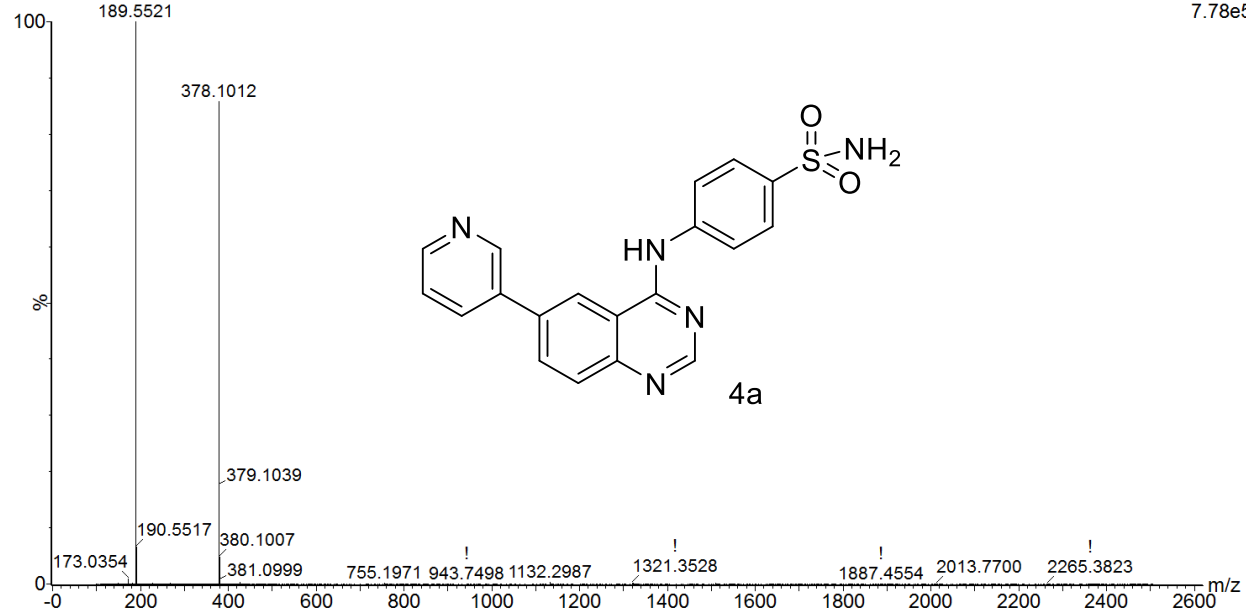

HHN-III-38 65 (1.156)

1: TOF MS ES+  
3.15e5

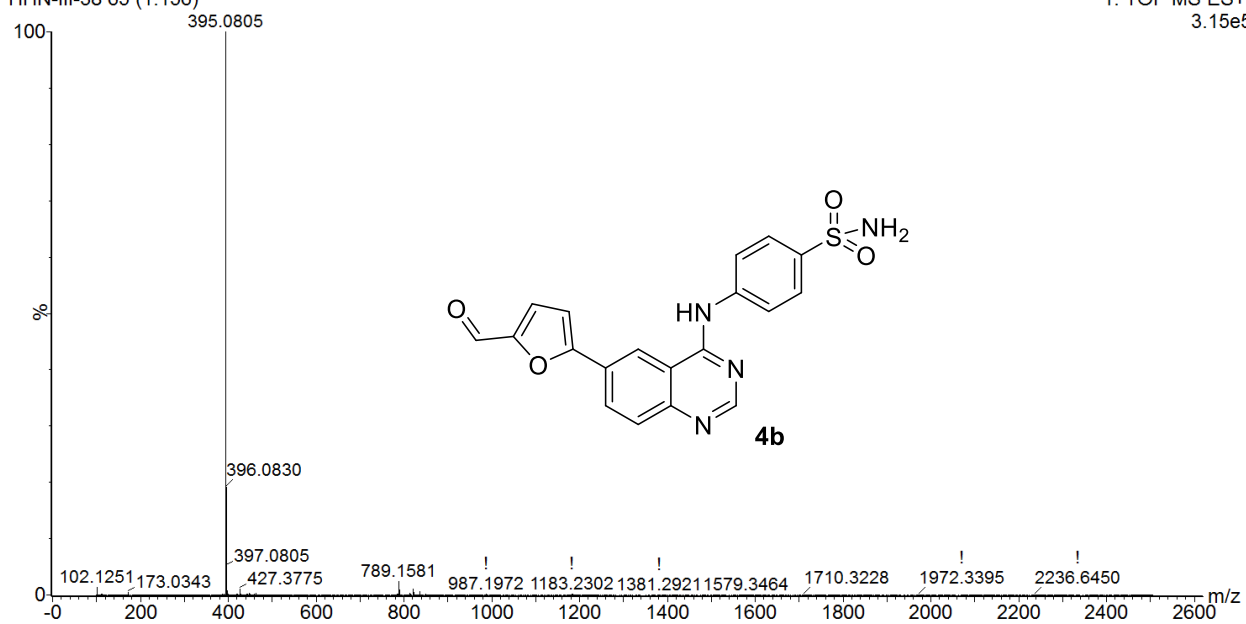

HHN-III-40 67 (1.190)

1: TOF MS ES+  
2.76e5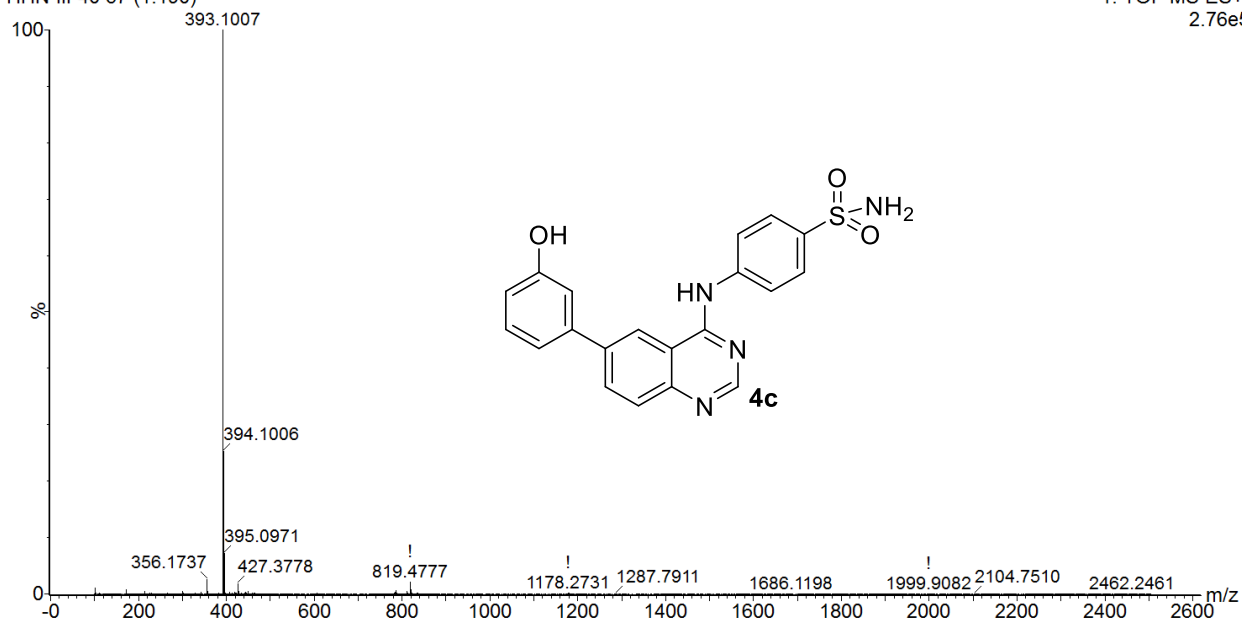

HHN-II-68 46 (0.822)

1: TOF MS ES+  
3.13e5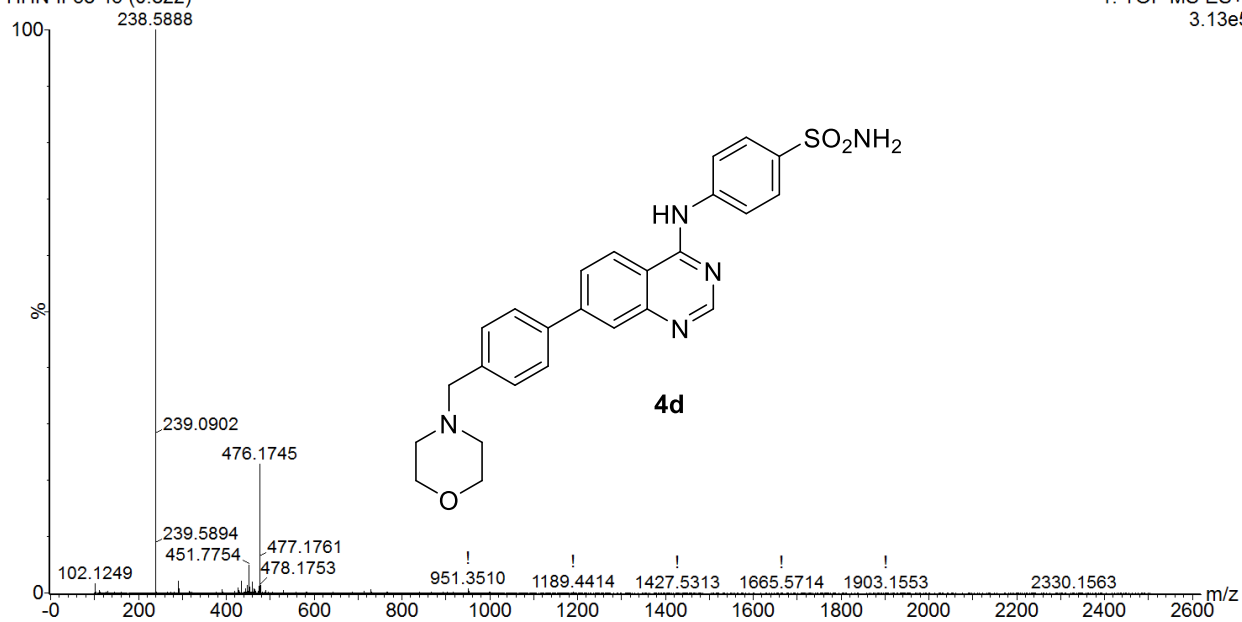

HHN-II-67 53 (0.942)

1: TOF MS ES+  
1.42e6

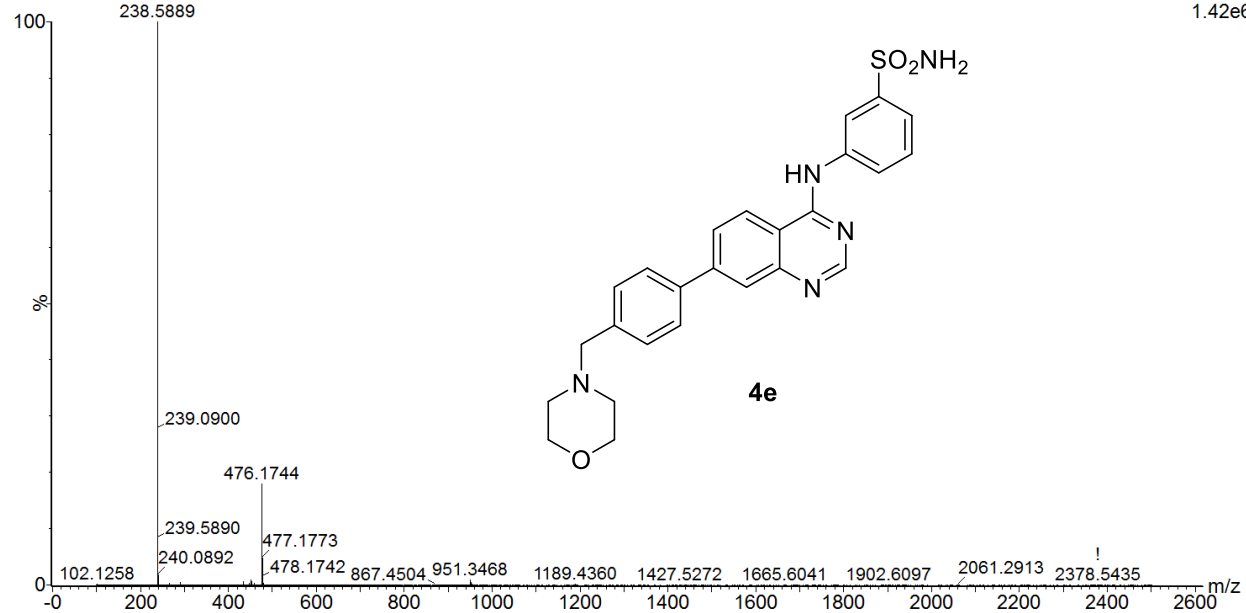

HHN-III-51 87 (1.541)

1: TOF MS ES+  
1.02e5

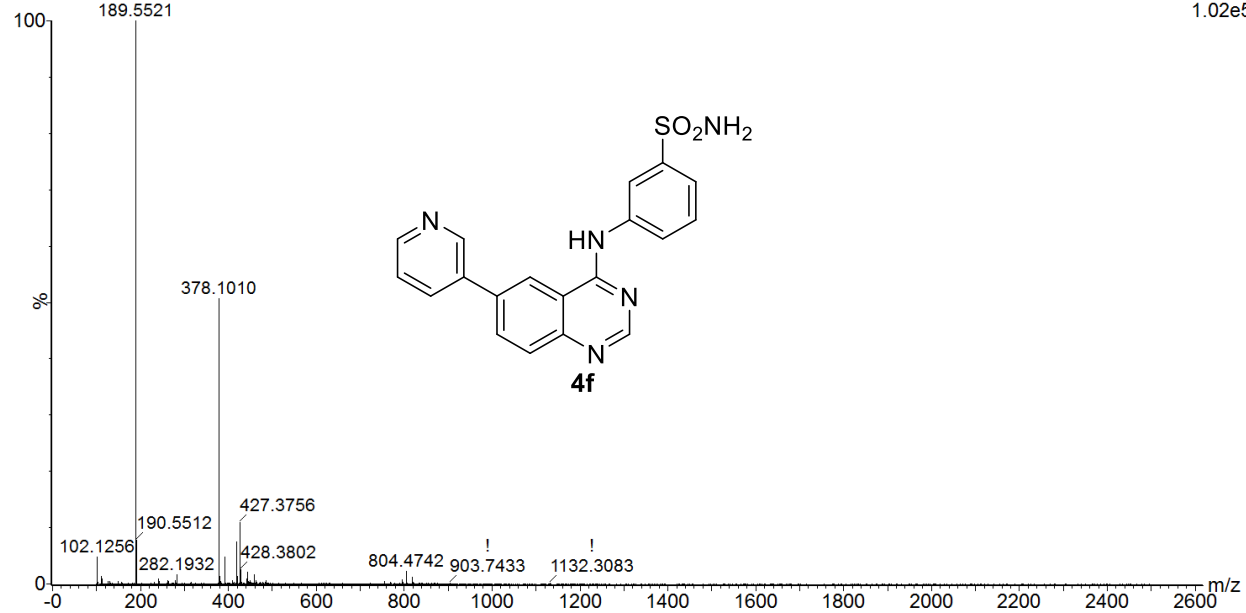

Supplement: s1 [file s1]
